# Supplementary material for: An insight into the role of riboflavin ligand in the self-assembly of poly(lactic-co-glycolic acid)-based nanoparticles – a molecular simulation and experimental approach
Source: Royal Society of Chemistry journal article supplement (doi:10.1039/d0sm00203h), 2020-01-01
Supplement: d0sm00203h2.pdf [file d0sm00203h2.pdf]

# **An Insight into The Role of Riboflavin Ligand on the Self-assembly of Poly (lactic-co-glycolic acid)-based Nanoparticles, A Molecular Simulation and Experimental**

## **Approach**

Sima Rezvantalab<sup>1</sup>, Mostafa Keshavarz Moraveji<sup>1,\*</sup>, Mohammad Khedri<sup>1</sup>, Reza Maleki<sup>2</sup>,

<sup>1</sup>Department of Chemical Engineering, Amirkabir University of Technology (Tehran Polytechnic), 424 Hafez Avenue, Tehran, 1591634311, Iran

<sup>2</sup>Department of Chemical Engineering, School of Chemical and Petroleum Engineering, Shiraz University, Shiraz, 71345, Iran

Corresponding Authors: [moraveji@aut.ac.ir](mailto:moraveji@aut.ac.ir)

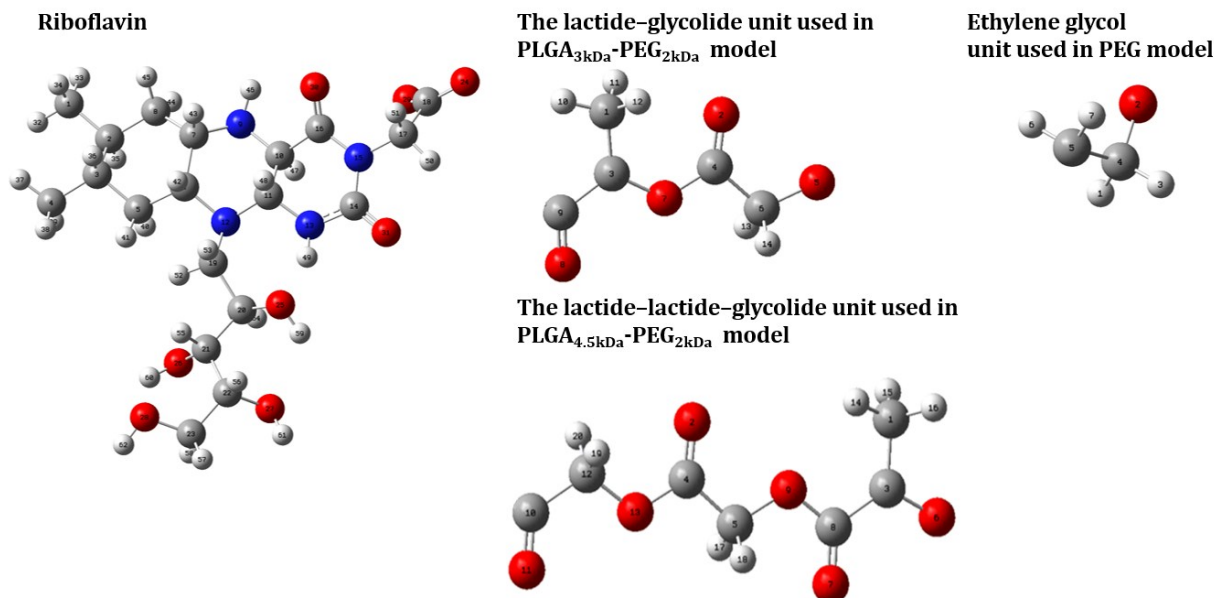

**Figure S1.** Atom types of molecules and polymers used in simulations. To mimic the real conditions, the monomer of two PLGA-PEG polymers has a different number of lactide-glycolide units. Details on the type and charge of atoms according to the numbers are provided in Table S1.

Table S1 provides further detail about the molecule structures used in the simulations.

**Table S1.** Specification of the OPLS-AA atom types and partial charges used in the simulations.

| Riboflavin |      |         | The monomer used in PLGA <sub>3kDa</sub> -PEG <sub>2kDa</sub> |      |         | Ethylene glycol |      |         |
|------------|------|---------|---------------------------------------------------------------|------|---------|-----------------|------|---------|
| NO.        | Atom | Charge  | NO.                                                           | Atom | Charge  | NO.             | atom | charge  |
| 1          | C00  | -0.0041 | 1                                                             | H00  | 0.3444  | 1               | H00  | 0.12    |
| 2          | C01  | 0.1634  | 2                                                             | O01  | -0.5099 | 2               | C01  | 0.0822  |
| 3          | C02  | -0.3509 | 3                                                             | C02  | -0.0017 | 3               | C02  | 0.0081  |
| 4          | O03  | -0.4288 | 4                                                             | C03  | 0.3645  | 4               | H03  | 0.12    |
| 5          | N04  | -0.571  | 5                                                             | H04  | 0.0785  | 5               | O04  | -0.5065 |
| 6          | C05  | 0.488   | 6                                                             | H05  | 0.0785  | 6               | H05  | 0.0881  |
| 7          | C06  | 0.5732  | 7                                                             | O06  | -0.2167 | 7               | H06  | 0.0881  |
| 8          | N07  | -0.652  | 8                                                             | O07  | -0.4362 |                 |      |         |
| 9          | O08  | -0.3554 | 9                                                             | C08  | -0.4679 |                 |      |         |
| 10         | C09  | 0.5054  | 10                                                            | C09  | -0.0784 |                 |      |         |

|    |     |         |                                                                 |     |         |
|----|-----|---------|-----------------------------------------------------------------|-----|---------|
| 11 | COA | -0.0361 | 11                                                              | COA | 0.2589  |
| 12 | O0B | -0.3565 | 12                                                              | H0B | 0.0314  |
| 13 | N0C | -0.1318 | 13                                                              | H0C | 0.0314  |
| 14 | C0D | -0.0472 | 14                                                              | H0D | 0.0314  |
| 15 | C0E | 0.1598  | 15                                                              | O0E | -0.545  |
| 16 | N0F | -0.5311 | 16                                                              | H0F | 0.037   |
| 17 | C0G | -0.0347 | The monomer used in PLGA <sub>4.5kDa</sub> -PEG <sub>2kDa</sub> |     |         |
| 18 | C0H | -0.1253 | 1                                                               | H00 | 0.3198  |
| 19 | C0I | -0.01   | 2                                                               | O01 | -0.4672 |
| 20 | C0J | -0.2623 | 3                                                               | C02 | -0.4246 |
| 21 | C0K | -0.17   | 4                                                               | C03 | -0.0879 |
| 22 | C0M | -0.1595 | 5                                                               | C04 | 0.3866  |
| 23 | C0N | -0.0298 | 6                                                               | H05 | 0.0234  |
| 24 | C0O | 0.1619  | 7                                                               | H06 | 0.0234  |
| 25 | C0P | -0.2278 | 8                                                               | H07 | 0.0234  |
| 26 | C0Q | -0.191  | 9                                                               | O08 | -0.3152 |
| 27 | C0R | -0.0805 | 10                                                              | O09 | -0.5549 |
| 28 | O0S | -0.5784 | 11                                                              | COA | 0.0221  |
| 29 | O0T | -0.3829 | 12                                                              | COB | 0.3713  |
| 30 | O0U | -0.4283 | 13                                                              | H0C | 0.1115  |
| 31 | O0V | -0.4579 | 14                                                              | H0D | 0.1115  |
| 32 | H0W | -0.0227 | 15                                                              | O0E | -0.3035 |
| 33 | H0X | -0.0227 | 16                                                              | O0F | -0.3926 |
| 34 | H0Y | 0.1532  | 17                                                              | C0G | -0.0544 |
| 35 | H0Z | 0.1532  | 18                                                              | C0H | 0.2193  |
| 36 | H10 | 0.1523  | 19                                                              | H0I | 0.1092  |
| 37 | H11 | 0.1667  | 20                                                              | H0J | 0.1092  |
| 38 | H12 | 0.0865  | 21                                                              | O0K | -0.3189 |
| 39 | H13 | 0.0865  | 22                                                              | H0M | 0.0887  |
| 40 | H14 | 0.0865  |                                                                 |     |         |
| 41 | H15 | 0.0799  |                                                                 |     |         |

|    |     |        |
|----|-----|--------|
| 42 | H16 | 0.0799 |
| 43 | H17 | 0.0799 |
| 44 | H18 | 0.1448 |
| 45 | H19 | 0.1448 |
| 46 | H1A | 0.1194 |
| 47 | H1B | 0.0556 |
| 48 | H1C | 0.0556 |
| 49 | H1D | 0.3246 |
| 50 | H1E | 0.3779 |
| 51 | H1F | 0.0325 |
| 52 | H1G | 0.4177 |
| 53 | H1H | 0.3927 |
| 54 | H1I | 0.4068 |

Prior to use polymer chains in the self-assembly process, we calculated the Rg and RMSD fluctuations for individual polymers in an aqueous environment to ensure the reliability of the results. In this regard, Fig.S2 demonstrates the RMSD and Rg for both polymer chains.

Fig. S2 shows the Rg fluctuation diagram for PLGA<sub>3kDa</sub>-PEG<sub>2kDa</sub> which starts at 0.5 nm and after 40 ns ends at the same Rg value. Results have good agreement with J. Andrews and E. Blaisten-Barojas<sup>1</sup> results. Moreover, the RMSD diagram has good agreement with Ansari et. al<sup>2</sup> report (Figure 3) on the subject as both diagrams have the same initial and final states. In the case of PLGA<sub>4.5kDa</sub>-PEG<sub>2kDa</sub>, our Rg and RMSD results have good agreements with Rg diagram (Figure 8) and RMSD (Figure 3) respectively, reported by Ansari et. al. These agreements with previous reports declare the reliability of our simulation.

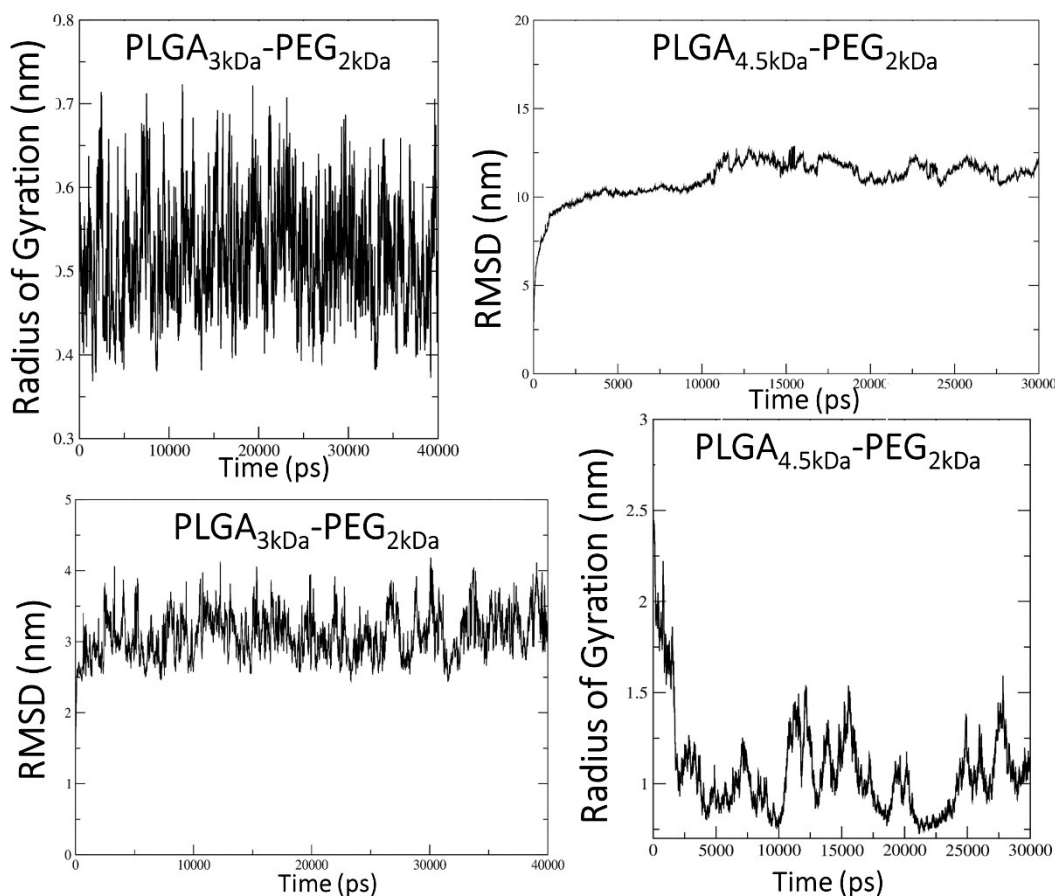

**Figure S2. Conformational changes and Gyration radii of individual polymers (PLGA<sub>3kDa</sub>-PEG<sub>2kDa</sub> and PLGA<sub>4.5kDa</sub>-PEG<sub>2kDa</sub>) in an aqueous environment.**

**Table S2. The interaction energy ( $\text{kJ/mol.atom}^*$ ) of NPs based on both polymers with varying RF-conjugated polymers**

| PLGA <sub>3kDa</sub> -PEG <sub>2kDa</sub>   |                     |                     |                            |
|---------------------------------------------|---------------------|---------------------|----------------------------|
| PP:PPR ratio                                | Electrostatic       | vdW                 | Total                      |
| 10:0                                        | -1.214861±0.042783  | -3.648339±0.161886  | -4.8632± 0.061795          |
| 9:1                                         | -1.1432584±0.038435 | -3.735799±0.131786  | -4.8790574±0.053896        |
| 8:2                                         | -1.1373482±0.047426 | -3.7467901±0.121818 | <b>-4.8841382±0.060764</b> |
| 7:3                                         | -1.0375081±0.041151 | -3.8434537±0.106962 | -4.8809617±0.053572        |
| 6:4                                         | -0.9402648±0.051421 | -3.8641452±0.100563 | -4.80441±0.060309          |
| 5:5                                         | -0.8474739±0.047234 | -3.8246445±0.088762 | -4.6721185±0.054706        |
| PLGA <sub>4.5kDa</sub> -PEG <sub>2kDa</sub> |                     |                     |                            |
| PP:PPR ratio                                | Electrostatic       | vdW                 | Total                      |
| 10:0                                        | -0.9793351±-0.0277  | -5.3851223±0.082699 | -6.3644574± 0.032          |
| 9:1                                         | -0.9511264±-0.03531 | -5.4134757±0.09924  | <b>-6.3646021±0.041439</b> |
| 8:2                                         | -0.8910546±-0.03865 | -5.3750609±0.107317 | -6.2661154±0.045865        |
| 7:3                                         | -0.858731±-0.03371  | -5.4013087±0.090762 | -6.2600397±0.039297        |
| 6:4                                         | -0.8472552±-0.03723 | -5.5146676±0.102983 | -6.3619227±0.044231        |
| 5:5                                         | -0.8212951±-0.03936 | -5.5019027±0.10605  | -6.3231978±0.047483        |

\*  $\text{kJ}/(\text{mol.atom})$  is the unit of normalized energy as energy divided by the bonding number.

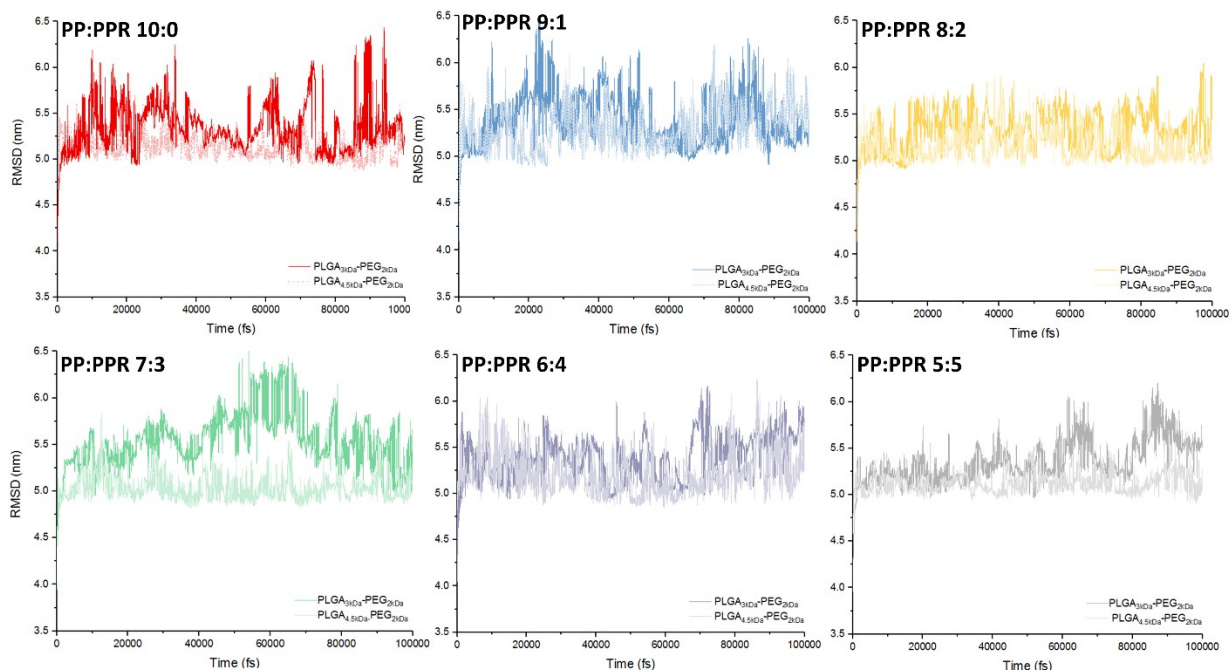

**Figure S3. Conformational changes in the PLGA-PEG-RF structure. Solid lines in all diagrams represent RMSD results in the varying PP: PPR ratios for PLGA<sub>3kDa</sub>-PEG<sub>2kDa</sub> and dots light-colored lines are related to PLGA<sub>4.5kDa</sub>-PEG<sub>2kDa</sub>. In agreement with previous results, most stable particles are achieved at PP: PPR ratio 8:2 and 9:1 for PLGA<sub>3kDa</sub>-PEG<sub>2kDa</sub> and PLGA<sub>4.5kDa</sub>-PEG<sub>2kDa</sub>, respectively.**

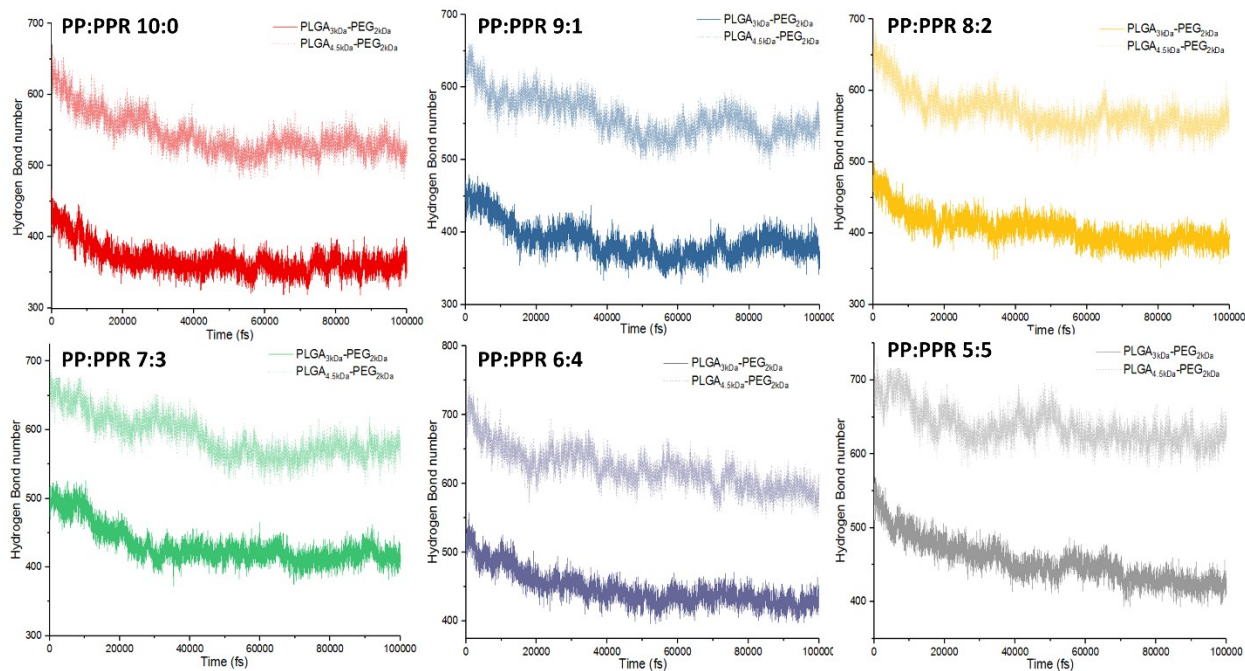

**Figure S4. Number of H-bonds formed during 100 ns precipitation process between the NP and water molecules**

in the various PP: PPR ratios. Solid color lines represent the H-bond formation for PLGA<sub>3kDa</sub>-PEG<sub>2kDa</sub> based NPs while the light-colored dot-lines depicts the same parameter for PLGA<sub>4.5kDa</sub>-PEG<sub>2kDa</sub> based NPs. In all cases, due to the higher number of monomers in the PLGA<sub>4.5kDa</sub>-PEG<sub>2kDa</sub> polymer chains H-bond counts are about 160-180 more than smaller polymer.

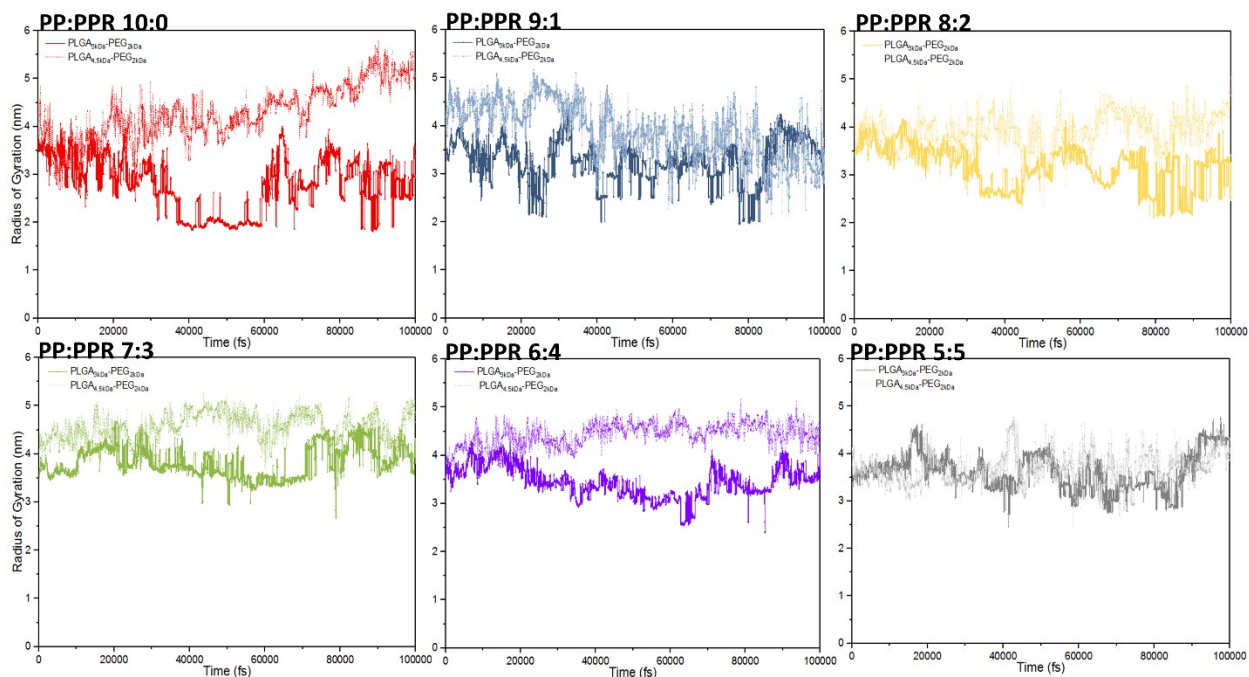

**Figure S5. Variation in the radius of gyration in 100 ns.** Rg final value and the variation in its values during the simulation are determinant in the stability of particle. The smallest the final Rg and the highest the variation in the Rg the stablest the nanoparticle. Although the PLGA<sub>4.5kDa</sub>-PEG<sub>2kDa</sub> has the biggest variation in Rg since its values are growing it shows that the particle is unstable.



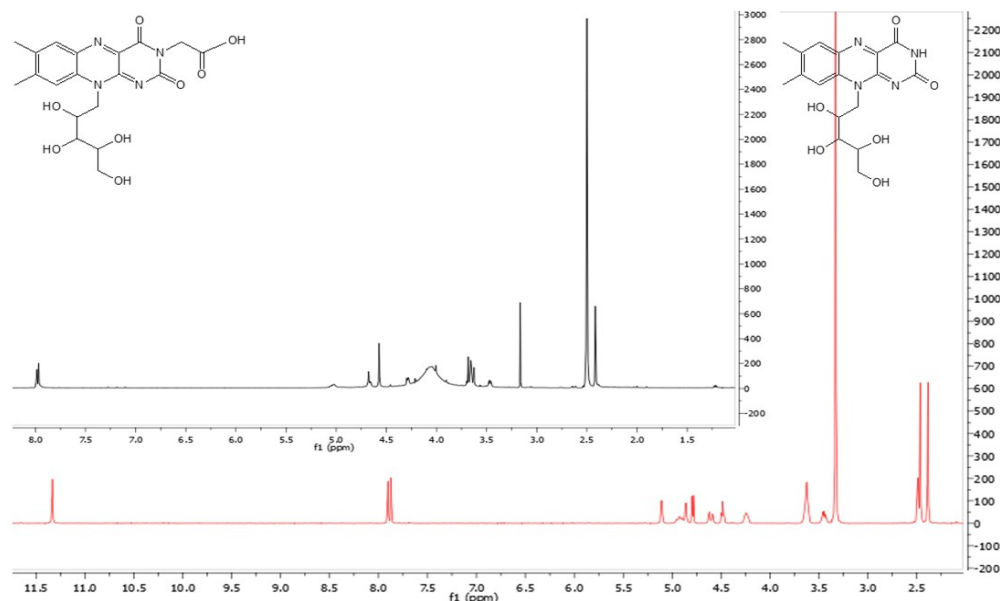

**Figure S6.**  $^1\text{H}$  NMR results in dimethyl sulfoxide- $d_6$  solvent for the initial and final materials in the ligand preparation process.

Details on the NMR spectrums and also for the middle stage are as following:

**Protection of hydroxyl groups on the ribitol chain.**  $^1\text{H}$  NMR (300 MHz;  $\text{CD}_3\text{OD}$ )  $\delta$ : 2.04 (s, 3H,  $\text{CH}_3$ ), 2.17 (s, 3H,  $\text{CH}_3$ ), 2.20 (s, 3H,  $\text{CH}_3$ ), 2.21 (s, 3H,  $\text{CH}_3$ ), 2.49 (s, 3H,  $\text{CH}_3$ ), 2.62 (s, 3H,  $\text{CH}_3$ ), 4.35 (ddd,  $J=18.5, 12.3, 4.6$  Hz, 3H,  $\text{CH}_2$ , CH), 4.59 (s, 1H, CH), 5.44 (td,  $J=3.2, 6.1, 6.1$ , 1H, CH), 5.44 (td,  $J=3.2, 6.1, 6.1$ , 1H, CH), 5.55 (m, 1H, CH), 5.69 (dd,  $J=12.5, 4.6$  Hz, 1H, CH), 7.84 (s 1H, CH), 7.95 (s 1H, CH).

**Derivatization of ethoxycarbonylmethyl group on protected riboflavin.**  $^1\text{H}$  NMR (600 MHz;  $\text{CDCl}_3$ )  $\delta$ : 1.28 (t,  $J=7.1$ , 3H,  $\text{CH}_3$ ), 1.77 (s, 3H,  $\text{CH}_3$ ), 2.08 (s, 3H,  $\text{CH}_3$ ), 2.21 (s, 3H,  $\text{CH}_3$ ), 2.30 (s, 3H,  $\text{CH}_3$ ), 2.45 (s, 3H,  $\text{CH}_3$ ), 2.57 (s, 3H,  $\text{CH}_3$ ), 4.31 (m, 5H,  $\text{CH}_2$ ), 4.82 (dd,  $J=2.1$  Hz, 2H,  $\text{CH}_2$ ), 4.42 (dd,  $J=5.0, 2.6$  Hz, 2H,  $\text{CH}_2$ ), 5.64 (s, 1H, CH), 7.57 (s 1H, CH), 8.05 (s 1H, CH).

**Deprotection of hydroxyl groups.**  $^1\text{H}$  NMR (300 MHz;  $\text{CD}_3\text{OD}$ )  $\delta$ : 2.49 (s, 3H,  $\text{CH}_3$ ),  $\delta$  2.60 (s, 3H,  $\text{CH}_3$ ), 3.67 (m, 1H, CH), 3.83 (m, 3H, CH,  $\text{CH}_2$ ), 4.45 (d,  $J=9.0$  Hz, 1H, CH), 4.76 (d,  $J=7.0$  Hz, 2H,  $\text{CH}_2$ ), 5.04 (dt,  $J=22.7, 11.7$  Hz, 2H,  $\text{CH}_2$ ), 8.05 (s 1H, CH), 8.18 (s 1H, CH).

## References

1. J. Andrews and E. Blaisten-Barojas, *The Journal of Physical Chemistry B*, 2019, **123**, 10233-10244.
2. M. Ansari, S. Moradi and M. Shahlaei, *Journal of Molecular Liquids*, 2018, **269**, 110-118.
